# Supplementary material for: Excitonic cuprophilic interactions in one-dimensional hybrid organic–inorganic crystals
Source: Royal Society of Chemistry journal article supplement (doi:10.1039/d3sc06255d), 2024-01-01
Supplement: d3sc06255d1.pdf [file d3sc06255d1.pdf]

**Electronic Supplementary Information for**

**Excitonic cuprophilic interactions in one-dimensional hybrid organic-inorganic crystal**

Nahid Hassan,<sup>a</sup> Suneetha Nagaraja,<sup>b</sup> Sauvik Saha,<sup>a</sup> Kartick Tarafder<sup>b</sup> & Nirmalya Ballav<sup>\*a</sup>

<sup>a</sup>Department of Chemistry, Indian Institute of Science Education and Research, Dr. Homi Bhabha Road, Pune – 411 008, India

<sup>b</sup>Department of Physics, National Institute of Technology Karnataka, Surathkal, Mangalore – 575 025, India.

\*Corresponding author. Email: [nballav@iiserpune.ac.in](mailto:nballav@iiserpune.ac.in)

Table S1. Crystal data and structure refinement for the (TMA)Cu<sub>2</sub>Br<sub>3</sub> system.

| Empirical Formula                                   | C <sub>4</sub> H <sub>12</sub> Br <sub>3</sub> Cu <sub>2</sub> N     |
|-----------------------------------------------------|----------------------------------------------------------------------|
| Formula Weight                                      | 440.96                                                               |
| Temperature/K                                       | 296(2)                                                               |
| Crystal System                                      | orthorhombic                                                         |
| Space group                                         | Pnma                                                                 |
| a/Å                                                 | 16.359(3)                                                            |
| b/Å                                                 | 6.5479(11)                                                           |
| c/Å                                                 | 9.5918(17)                                                           |
| $\alpha$ /°                                         | 90                                                                   |
| $\beta$ /°                                          | 90                                                                   |
| $\gamma$ /°                                         | 90                                                                   |
| Volume/Å <sup>3</sup>                               | 1027.5(3)                                                            |
| Z                                                   | 4                                                                    |
| Density ( $\rho_{\text{calc}}$ )/g.cm <sup>-3</sup> | 2.851                                                                |
| Absorption coefficient ( $\mu$ )/mm <sup>-1</sup>   | 15.741                                                               |
| F(000)                                              | 824.0                                                                |
| Radiation                                           | MoK $\alpha$ ( $\lambda$ = 0.71073 Å)                                |
| $\Theta$ range for data collection/°                | 2.46 to 28.34                                                        |
| Index ranges                                        | -21 $\leq$ h $\leq$ 21, -8 $\leq$ k $\leq$ 8, -12 $\leq$ l $\leq$ 12 |
| Reflections collected                               | 19735                                                                |
| Independent reflections                             | 1392 [ $R_{\text{int}}$ = 0.0692, $R_{\text{sigma}}$ = 0.0275]       |
| Coverage of independent reflections                 | 99.9%                                                                |
| Function minimized                                  | $\Sigma w(F_o^2 - F_c^2)^2$                                          |
| Data/restraints/parameters                          | 1392/0/59                                                            |
| Goodness-of-fit on F <sup>2</sup>                   | 0.860                                                                |
| Final R indexes [ $I > 2\sigma(I)$ ]                | 1325 data, $R_1$ = 0.0241, $wR_2$ = 0.0944                           |
| Final R indexes [all data]                          | $R_1$ = 0.0258, $wR_2$ = 0.0971                                      |
| Largest diff. peak and hole/ eÅ <sup>-3</sup>       | 0.897 and -0.873                                                     |
| R.M.S. deviation from mean/ eÅ <sup>-3</sup>        | 0.182                                                                |

---

Table S2. Fractional Atomic Coordinates for the (TMA)Cu<sub>2</sub>Br<sub>3</sub> single crystal.

---

| Atom | <i>x</i>   | <i>y</i>   | <i>z</i>   |
|------|------------|------------|------------|
| Br1  | 0.45759(2) | 0.75       | 0.63059(3) |
| Cu1  | 0.42516(2) | 0.49878(5) | 0.43192(4) |
| Br2  | 0.39680(3) | 0.75       | 0.24955(4) |
| Br3  | 0.32552(2) | 0.25       | 0.50566(4) |
| N1   | 0.6468(2)  | 0.75       | 1.0272(3)  |
| C2   | 0.6545(2)  | 0.9352(5)  | 1.1172(3)  |
| C3   | 0.5657(2)  | 0.75       | 0.9569(4)  |
| C4   | 0.7123(3)  | 0.75       | 0.9189(4)  |

---

Table S3. Bond lengths and bond angles in the (TMA)Cu<sub>2</sub>Br<sub>3</sub> single crystal.

| Atom | Atom | Length/Å  | Atom | Atom | Atom | Angle/° |
|------|------|-----------|------|------|------|---------|
| Cu1  | Br2  | 2.4456    | Cu1  | Br1  | Cu1  | 65.08   |
| Cu1  | Br3  | 2.4106    | Cu1  | Br1  | Cu1  | 112.57  |
| Cu1  | Cu1  | 2.7752(6) | Cu1  | Br1  | Cu1  | 79.49   |
| Cu1  | Br1  | 2.5869    | Cu1  | Br1  | Cu1  | 78.06   |
| Cu1  | Br1  | 2.5727    | Br1  | Cu1  | Br2  | 97.98   |
| N1   | C2   | 1.494     | Br1  | Cu1  | Br3  | 110.74  |
| N1   | C3   | 1.488     | Br1  | Cu1  | Cu1  | 57.71   |
| N1   | C4   | 1.492     | Br1  | Cu1  | Br1  | 114.92  |
| ---  | ---  | ---       | Br2  | Cu1  | Br3  | 122.42  |
| ---  | ---  | ---       | Br2  | Cu1  | Cu1  | 120.01  |
| ---  | ---  | ---       | Br2  | Cu1  | Br1  | 113.48  |
| ---  | ---  | ---       | Br3  | Cu1  | Cu1  | 117.54  |
| ---  | ---  | ---       | Br3  | Cu1  | Br1  | 98.27   |
| ---  | ---  | ---       | Cu1  | Cu1  | Br1  | 57.21   |
| ---  | ---  | ---       | Cu1  | Br2  | Cu1  | 84.54   |
| ---  | ---  | ---       | Cu1  | Br3  | Cu1  | 85.03   |
| ---  | ---  | ---       | C2   | N1   | C3   | 109.7   |
| ---  | ---  | ---       | C2   | N1   | C4   | 110     |
| ---  | ---  | ---       | C2   | N1   | C2   | 108.5   |
| ---  | ---  | ---       | C3   | N1   | C4   | 108.9   |

Table S4. Symmetry operators for the (TMA)Cu<sub>2</sub>Br<sub>3</sub> single crystal.

| Symm. Op.           | Description            | Detailed Description                                                                             | Order |
|---------------------|------------------------|--------------------------------------------------------------------------------------------------|-------|
| $x,y,z$             | Identity               | Identity                                                                                         | 1     |
| $1/2-x,y,1/2+z$     | Screw axis<br>(2-fold) | 2-fold screw axis with direction $[0, 0, 1]$ at $1/4, 0, z$ with screw component $[0, 0, 1/2]$   | 2     |
| $-x,1/2+y,-z$       | Screw axis<br>(2-fold) | 2-fold screw axis with direction $[0, 1, 0]$ at $0, y, 0$ with screw component $[0, 1/2, 0]$     | 2     |
| $1/2+x,1/2-y,1/2-z$ | Screw axis<br>(2-fold) | 2-fold screw axis with direction $[1, 0, 0]$ at $x, 1/4, 1/4$ with screw component $[1/2, 0, 0]$ | 2     |
| $-x,-y,-z$          | Inversion<br>centre    | Inversion at $[0, 0, 0]$                                                                         | 2     |
| $1/2+x,y,1/2-z$     | Glide plane            | Glide plane perpendicular to $[0, 0, 1]$ with glide component $[1/2, 0, 0]$                      | 2     |
| $x,1/2-y,z$         | Mirror<br>plane        | Mirror plane perpendicular to $[0, 1, 0]$                                                        | 2     |
| $1/2-x,1/2+y,1/2+z$ | Glide plane            | Glide plane perpendicular to $[1, 0, 0]$ with glide component $[0, 1/2, 1/2]$                    | 2     |

Table S5. Crystal data and structure refinement for the (TMA)Ag<sub>2</sub>Br<sub>3</sub> system.

| Empirical Formula                                   | C <sub>4</sub> H <sub>12</sub> Br <sub>3</sub> Ag <sub>2</sub> N     |
|-----------------------------------------------------|----------------------------------------------------------------------|
| Formula Weight                                      | 529.62                                                               |
| Temperature/K                                       | 150(2)                                                               |
| Crystal System                                      | orthorhombic                                                         |
| Space group                                         | Pnma                                                                 |
| a/Å                                                 | 16.535(2)                                                            |
| b/Å                                                 | 7.0771(9)                                                            |
| c/Å                                                 | 9.6517(11)                                                           |
| $\alpha$ /°                                         | 90                                                                   |
| $\beta$ /°                                          | 90                                                                   |
| $\gamma$ /°                                         | 90                                                                   |
| Volume/Å <sup>3</sup>                               | 1129.4(2)                                                            |
| Z                                                   | 4                                                                    |
| Density ( $\rho_{\text{calc}}$ )/g.cm <sup>-3</sup> | 3.115                                                                |
| Absorption coefficient ( $\mu$ )/mm <sup>-1</sup>   | 14.022                                                               |
| F(000)                                              | 968.0                                                                |
| Radiation                                           | MoK $\alpha$ ( $\lambda$ = 0.71073 Å)                                |
| $\Theta$ range for data collection/°                | 2.46 to 25.03                                                        |
| Index ranges                                        | -19 $\leq$ h $\leq$ 19, -8 $\leq$ k $\leq$ 8, -10 $\leq$ l $\leq$ 11 |
| Reflections collected                               | 15396                                                                |
| Independent reflections                             | 1087 [ $R_{\text{int}}$ = 0.0448, $R_{\text{sigma}}$ = 0.0179]       |
| Coverage of independent reflections                 | 99.8%                                                                |
| Function minimized                                  | $\Sigma w(F_o^2 - F_c^2)^2$                                          |
| Data/restraints/parameters                          | 1087/0/58                                                            |
| Goodness-of-fit on F <sup>2</sup>                   | 1.219                                                                |
| Final R indexes [ $I > 2\sigma(I)$ ]                | 1009 data, $R_1$ = 0.0222, $wR_2$ = 0.0480                           |

|                                                 |                                  |
|-------------------------------------------------|----------------------------------|
| Final R indexes [all data]                      | $R_1 = 0.0252$ , $wR_2 = 0.0489$ |
| Largest diff. peak and hole/ $e\text{\AA}^{-3}$ | 0.598 and -1.401                 |
| R.M.S. deviation from mean/ $e\text{\AA}^{-3}$  | 0.265                            |

Table S6. Fractional Atomic Coordinates for the (TMA)Ag<sub>2</sub>Br<sub>3</sub> single crystal.

| Atom | <i>x</i>   | <i>y</i>   | <i>z</i>   |
|------|------------|------------|------------|
| Ag1  | 0.42040(2) | 0.49756(3) | 0.57957(3) |
| Br1  | 0.45040(3) | 0.75       | 0.36287(4) |
| Br2  | 0.39770(3) | 0.75       | 0.77831(5) |
| Br3  | 0.31064(3) | 0.25       | 0.50893(6) |
| N1   | 0.3549(2)  | 0.25       | 0.0374(4)  |
| C11  | 0.3552(3)  | 0.4219(4)  | 0.1275(4)  |
| C12  | 0.2820(3)  | 0.25       | -0.0531(6) |
| C13  | 0.4285(3)  | 0.25       | -0.0506(5) |

Table S7. Bond lengths and bond angles in the (TMA)Ag<sub>2</sub>Br<sub>3</sub> single crystal.

| Atom | Atom | Length/Å | Atom | Atom | Atom | Angle/° |
|------|------|----------|------|------|------|---------|
| Ag1  | Br1  | 2.795    | Br1  | Ag1  | Br2  | 97.81   |
| Ag1  | Br2  | 2.648    | Br1  | Ag1  | Br3  | 110.89  |
| Ag1  | Br3  | 2.6131   | Br1  | Ag1  | Ag1  | 57.48   |
| N1   | C11  | 1.495    | Br1  | Ag1  | Br1  | 114.23  |
| N1   | C12  | 1.489    | Br2  | Ag1  | Br3  | 122.88  |
| N1   | C13  | 1.484    | Br2  | Ag1  | Ag1  | 118.67  |
| C11  | H11A | 0.98     | Br2  | Ag1  | Br1  | 112.59  |
| C11  | H11B | 0.98     | Br3  | Ag1  | Ag1  | 118.42  |
| C11  | H11C | 0.98     | Br3  | Ag1  | Br1  | 99.27   |
| C12  | H12A | 0.981    | Ag1  | Ag1  | Br1  | 56.75   |
| C12  | H12B | 0.98     | Ag1  | Br1  | Ag1  | 65.77   |
| C12  | H12C | 0.98     | Ag1  | Br1  | Ag1  | 112.61  |
| C13  | H13A | 0.98     | Ag1  | Br1  | Ag1  | 79.46   |
| C13  | H13B | 0.98     | Ag1  | Br1  | Ag1  | 76.88   |
| C13  | H13C | 0.98     | Ag1  | Br2  | Ag1  | 84.86   |
| ---  | ---  | ---      | Ag1  | Br3  | Ag1  | 84.21   |
| ---  | ---  | ---      | C11  | N1   | C12  | 110.1   |
| ---  | ---  | ---      | C11  | N1   | C13  | 109.3   |
| ---  | ---  | ---      | C11  | N1   | C11  | 108.9   |
| ---  | ---  | ---      | C12  | N1   | C13  | 109.2   |



Table S8. Symmetry operators for the (TMA)Ag<sub>2</sub>Br<sub>3</sub> single crystal.

| Symm. Op.           | Description            | Detailed Description                                                                             | Order |
|---------------------|------------------------|--------------------------------------------------------------------------------------------------|-------|
| $x,y,z$             | Identity               | Identity                                                                                         | 1     |
| $1/2-x,-y,1/2+z$    | Screw axis<br>(2-fold) | 2-fold screw axis with direction $[0, 0, 1]$ at $1/4, 0, z$ with screw component $[0, 0, 1/2]$   | 2     |
| $-x,1/2+y,-z$       | Screw axis<br>(2-fold) | 2-fold screw axis with direction $[0, 1, 0]$ at $0, y, 0$ with screw component $[0, 1/2, 0]$     | 2     |
| $1/2+x,1/2-y,1/2-z$ | Screw axis<br>(2-fold) | 2-fold screw axis with direction $[1, 0, 0]$ at $x, 1/4, 1/4$ with screw component $[1/2, 0, 0]$ | 2     |
| $-x,-y,-z$          | Inversion<br>centre    | Inversion at $[0, 0, 0]$                                                                         | 2     |
| $1/2+x,y,1/2-z$     | Glide plane            | Glide plane perpendicular to $[0, 0, 1]$ with glide component $[1/2, 0, 0]$                      | 2     |
| $x,1/2-y,z$         | Mirror<br>plane        | Mirror plane perpendicular to $[0, 1, 0]$                                                        | 2     |
| $1/2-x,1/2+y,1/2+z$ | Glide plane            | Glide plane perpendicular to $[1, 0, 0]$ with glide component $[0, 1/2, 1/2]$                    | 2     |

Table S9. Light intensity vs Responsivity of (TMA)Cu<sub>2</sub>Br<sub>3</sub> device at 1 V bias under 450 nm light

| <b>Light Intensity (mW.mm<sup>-2</sup>)</b> | <b>Responsivity, R (nA/W)</b> |
|---------------------------------------------|-------------------------------|
| 10                                          | 0.469                         |
| 20                                          | 0.323                         |
| 30                                          | 0.268                         |
| 40                                          | 0.240                         |
| 50                                          | 0.235                         |

Photoresponsivity (R) is calculated by the following expression:

$$R = \frac{I_{photo}}{(P * A)}$$

where  $I_{photo}$  refers to  $(I_{light} - I_{dark})$ ,  $P$  is the incident light intensity,  $A$  stands for the active area between the contact electrodes ( $A = 1.90 \text{ mm} \times 0.37 \text{ mm} \times \pi$ ).

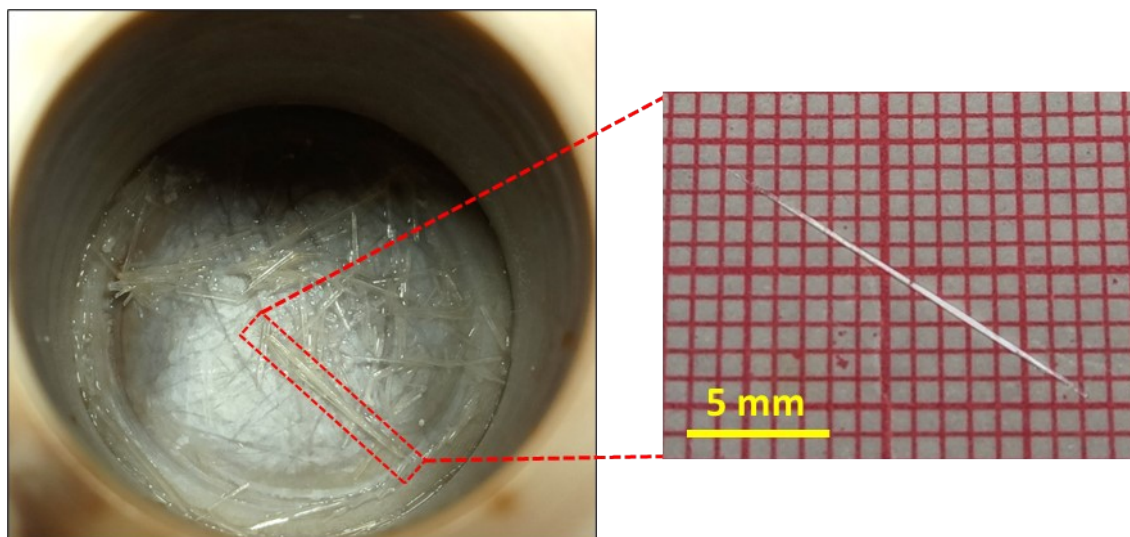

**Figure S1.** Optical image of  $(\text{TMA})\text{Cu}_2\text{Br}_3$  single crystals grown in a Teflon lined autoclave (left panel) and zoomed-in view of a needle-like single crystal with dimensions of approximately 16 mm x 0.5 mm (right panel).

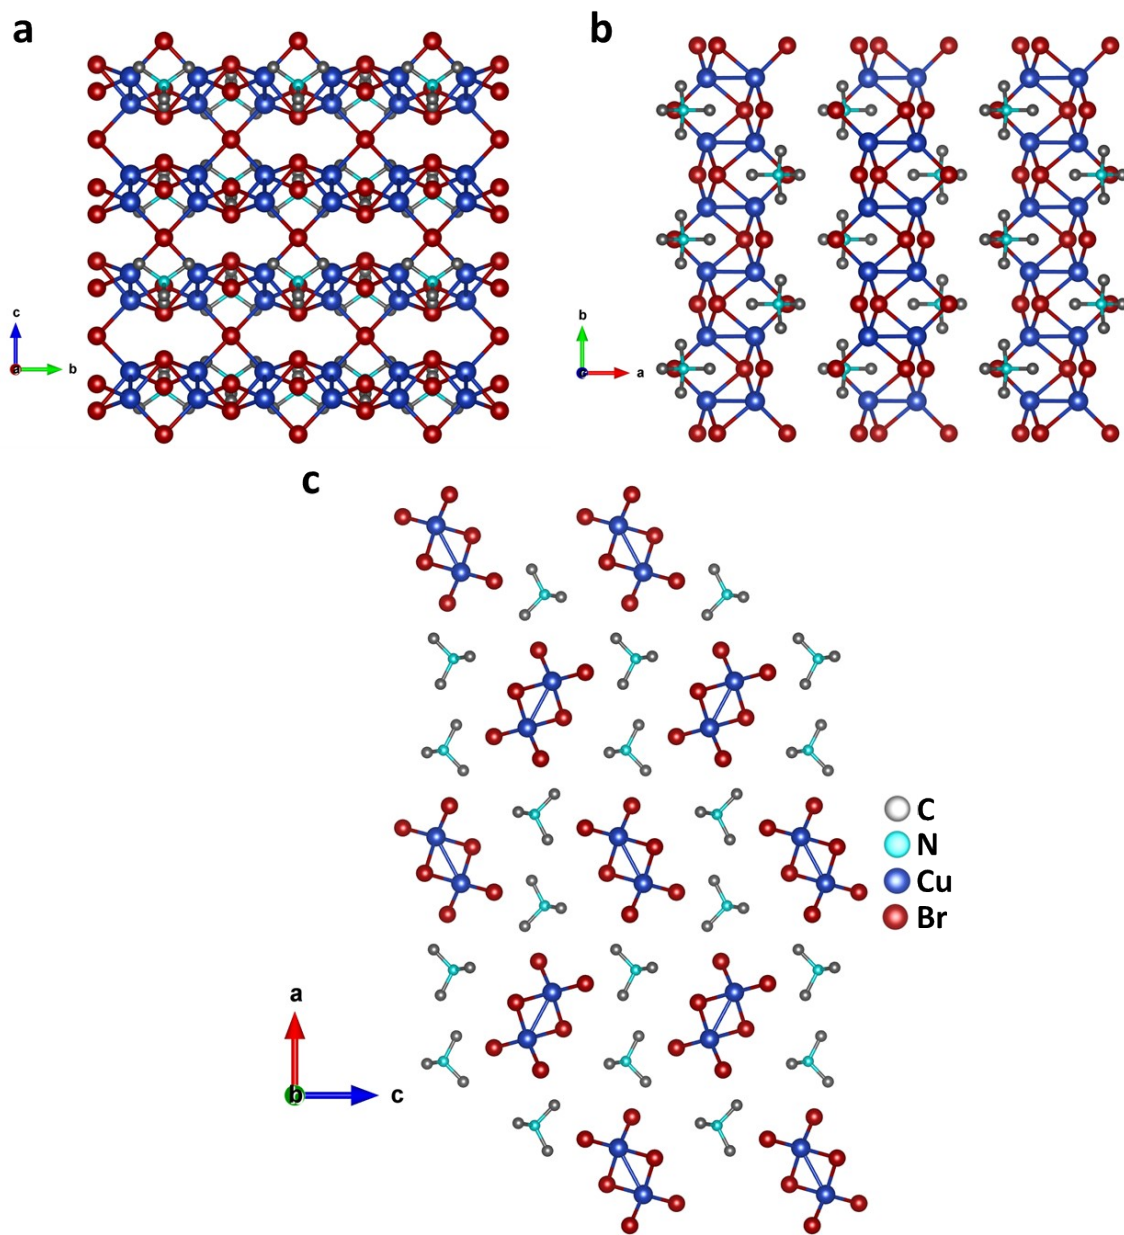

**Figure S2.** Crystal structure of  $(\text{TMA})\text{Cu}_2\text{Br}_3$  viewed along (a) a-axis, (b) c-axis, and (c) b-axis. H atoms are omitted for clarity. Each  $(\text{Cu}_2\text{Br}_3)_n$  inorganic ladder is surrounded by six stacks of TMA<sup>+</sup> cations.

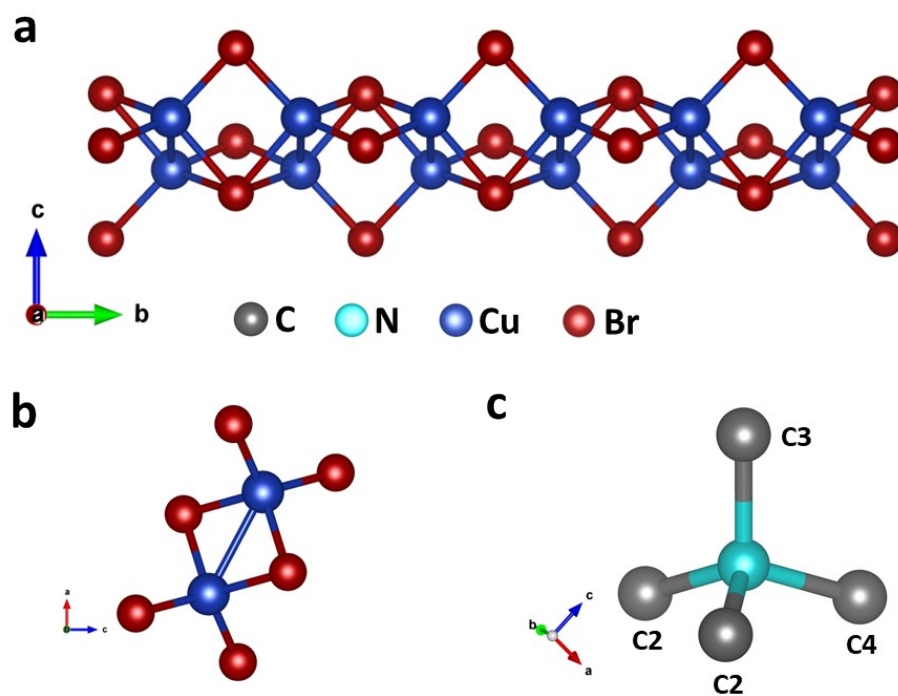

**Figure S3.** Polymeric chain of  $(\text{Cu}_2\text{Br}_3)_n^-$  anions viewed along (a) a-axis, (b) b-axis. (c) Zoomed-in view of tetramethylammonium (TMA) cation. Carbon, nitrogen, copper, and bromine atoms are represented by grey, cyan, blue, and red coloured spheres.

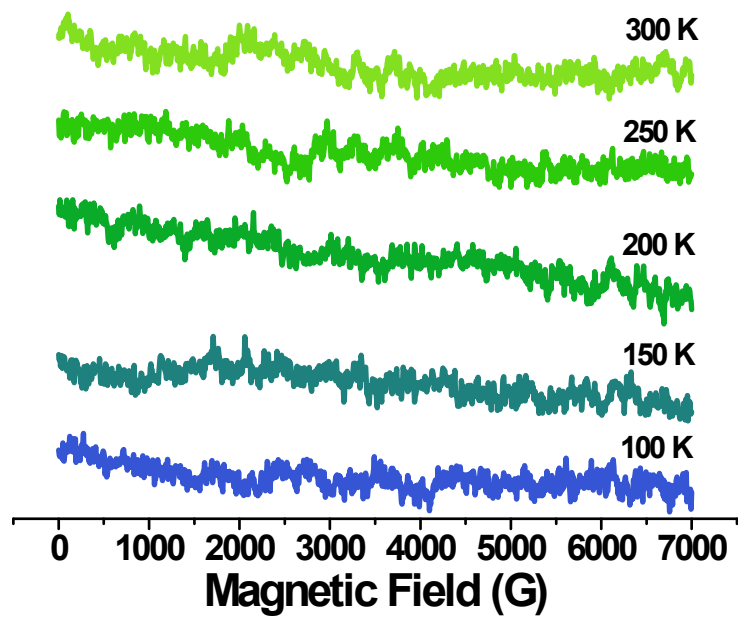

**Figure S4.** Temperature-dependent EPR spectra at X-band recorded for the (TMA)Cu<sub>2</sub>Br<sub>3</sub> system in the temperature range from 100 K to 300 K.

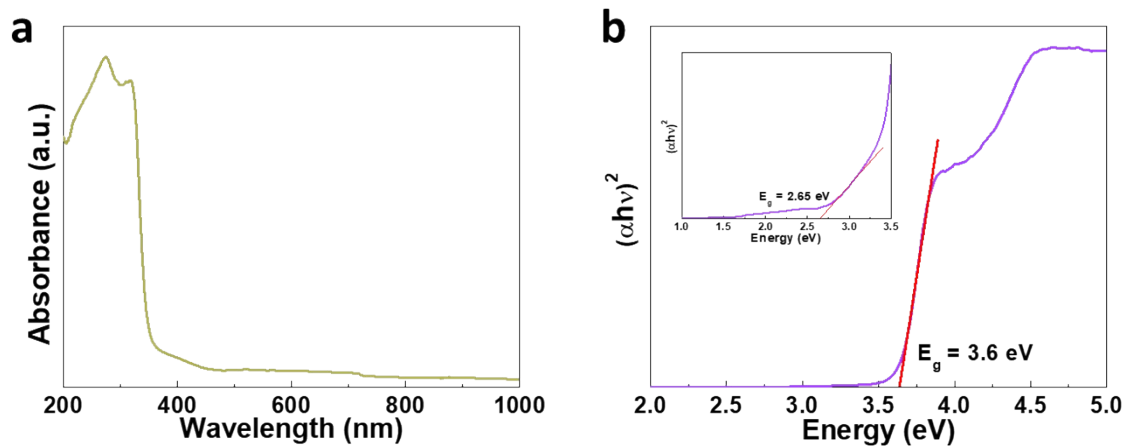

**Figure S5.** (a) Room temperature solid-state UV-visible absorption (DRS) spectrum of (TMA)Cu<sub>2</sub>Br<sub>3</sub>. (b) Tauc plot of (TMA)Cu<sub>2</sub>Br<sub>3</sub> showing the band gap (inset shows the band gap corresponding to the lower energy region).

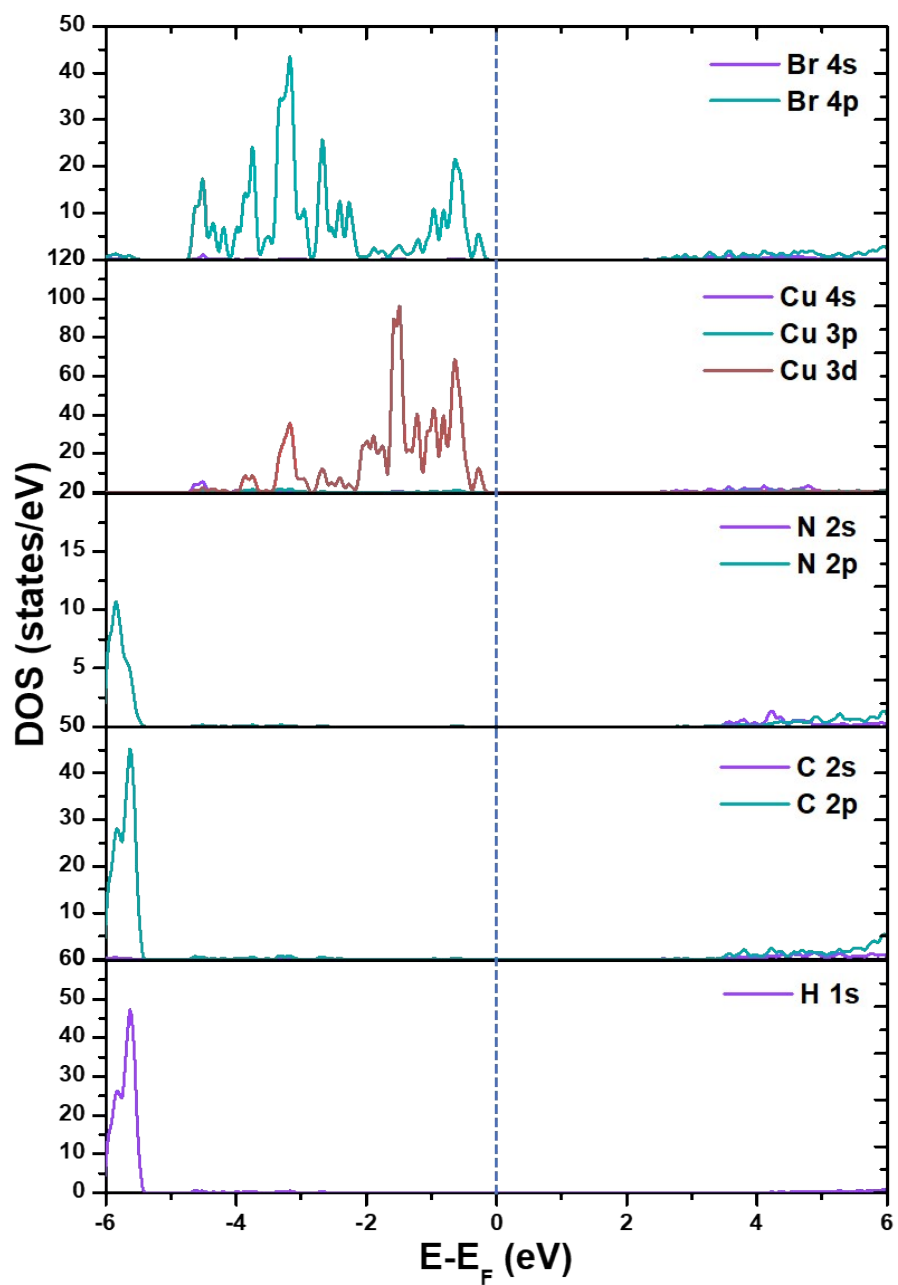

**Figure S6.** Orbital resolved partial density of state (DOS) plots for H, C, N, Cu and Br atoms. Fermi energy ( $E_F$ ) marked by dotted blue line.



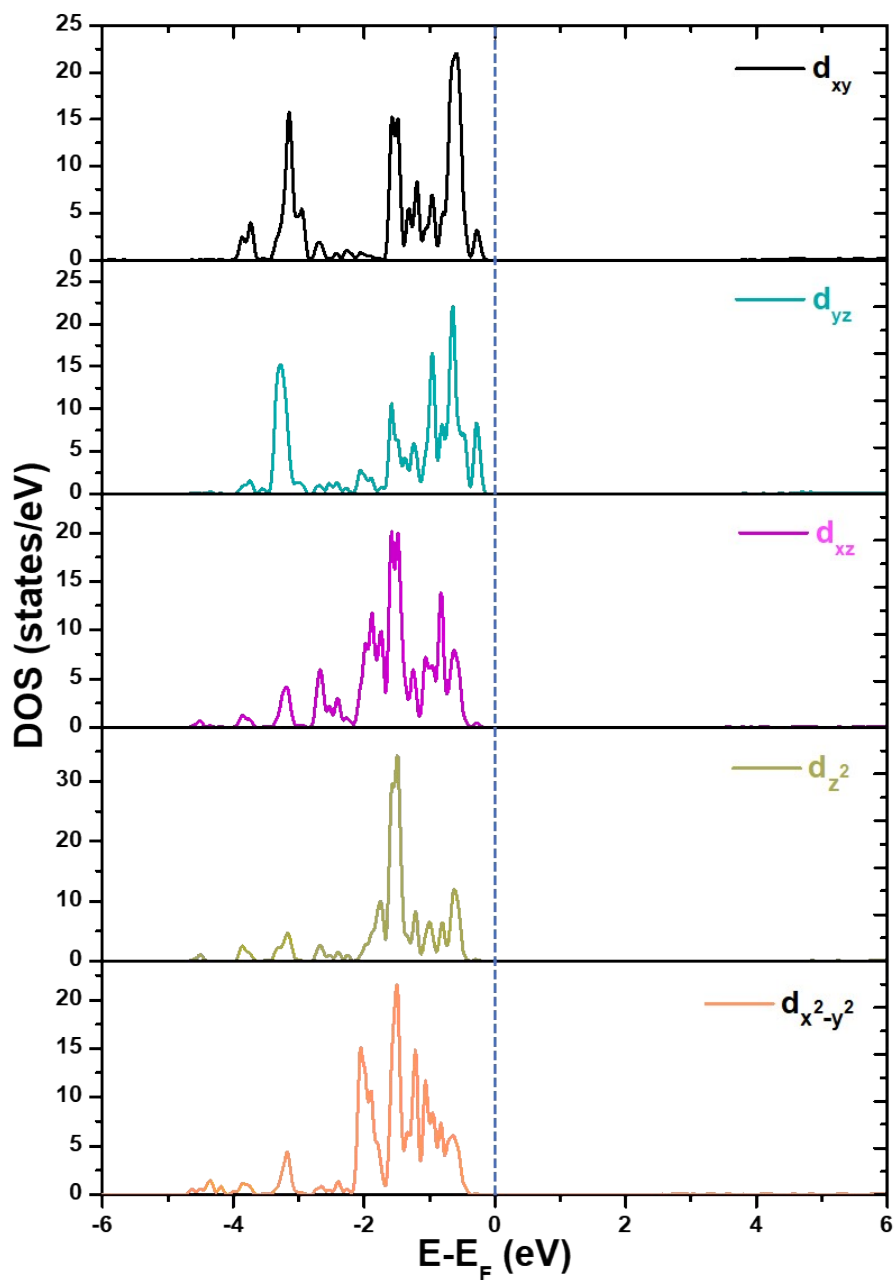

**Figure S7.** d-orbital resolved partial density of state (DOS) plots for Cu 3d. Fermi energy ( $E_F$ ) marked by dotted blue line.

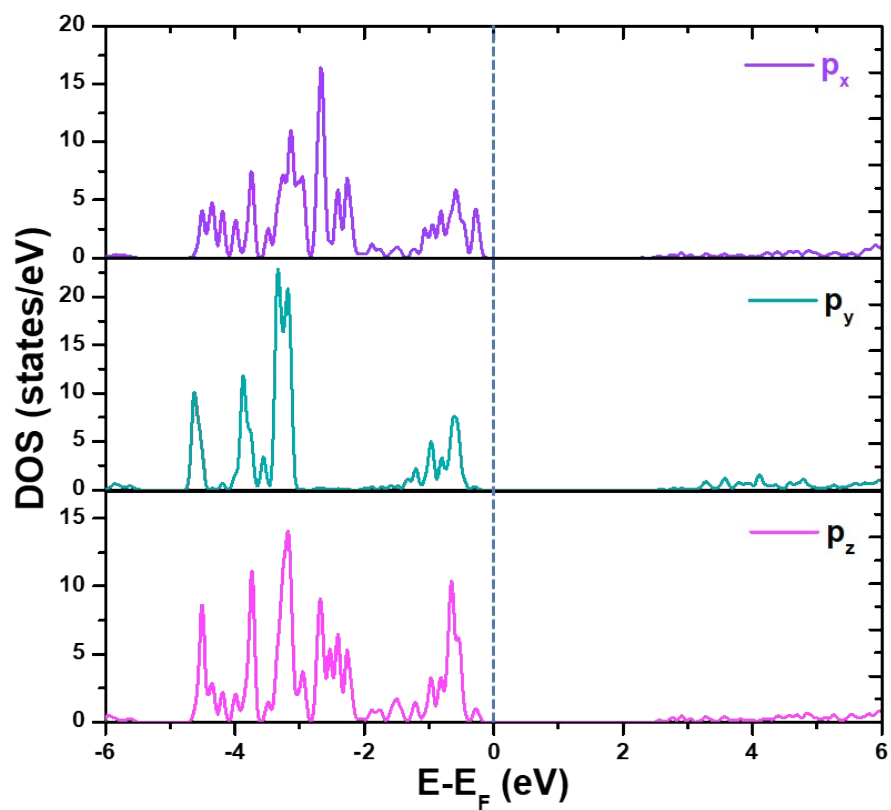

**Figure S8.** p-orbital resolved partial density of state (DOS) plots for Br 4p. Fermi energy ( $E_F$ ) marked by dotted blue line.

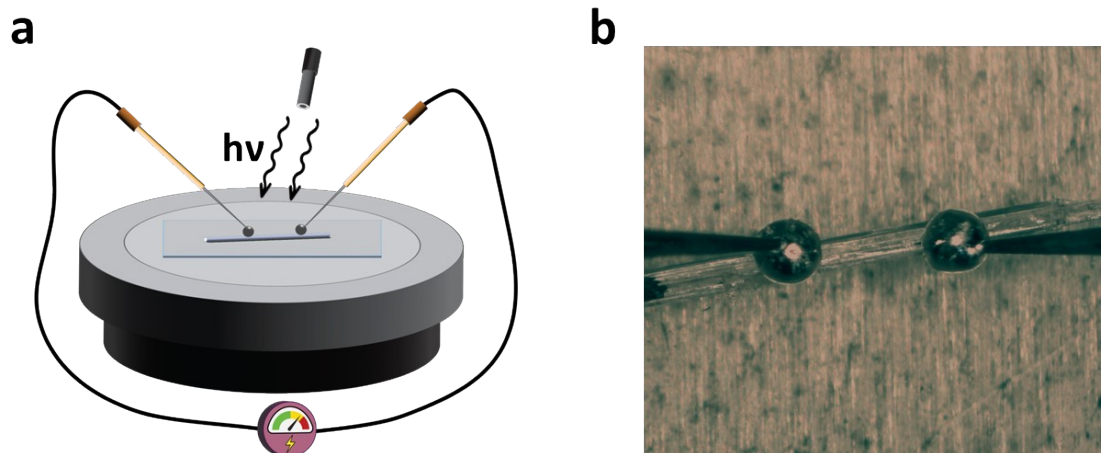

**Figure S9.** (a) Schematic representation of the measurements of photoresponsivity of the  $(\text{TMA})\text{Cu}_2\text{Br}_3$  system and (b) optical image of the single crystal device with EGaIn contact electrodes.

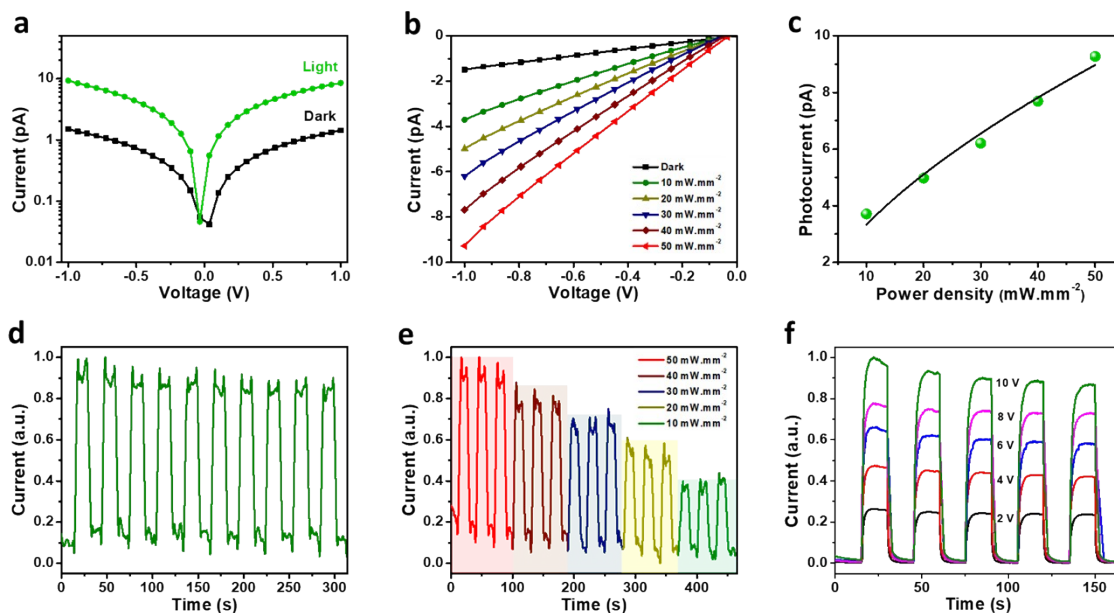

**Figure S10.** (a)  $I$ - $V$  curves in dark and under light intensity of  $50 \text{ mW}\cdot\text{mm}^{-2}$  ( $532 \text{ nm}$ ). (b)  $I$ - $V$  curves under varying light intensity ranging from  $10 \text{ mW}\cdot\text{mm}^{-2}$  to  $50 \text{ mW}\cdot\text{mm}^{-2}$ . (c) Plot of photocurrent variation with incident light intensity. Data points are fitted using the power law. (d) Time dependent photocurrent response under  $50 \text{ mW}\cdot\text{mm}^{-2}$  light intensity at  $0 \text{ V}$  bias (normalized plots). Current as a function of time ( $I$ - $t$ ) curves at different (e) light irradiation intensities ( $0 \text{ V}$  bias) (normalized plots) and (f) bias voltages ( $50 \text{ mW}\cdot\text{mm}^{-2}$ ) (normalized plots).

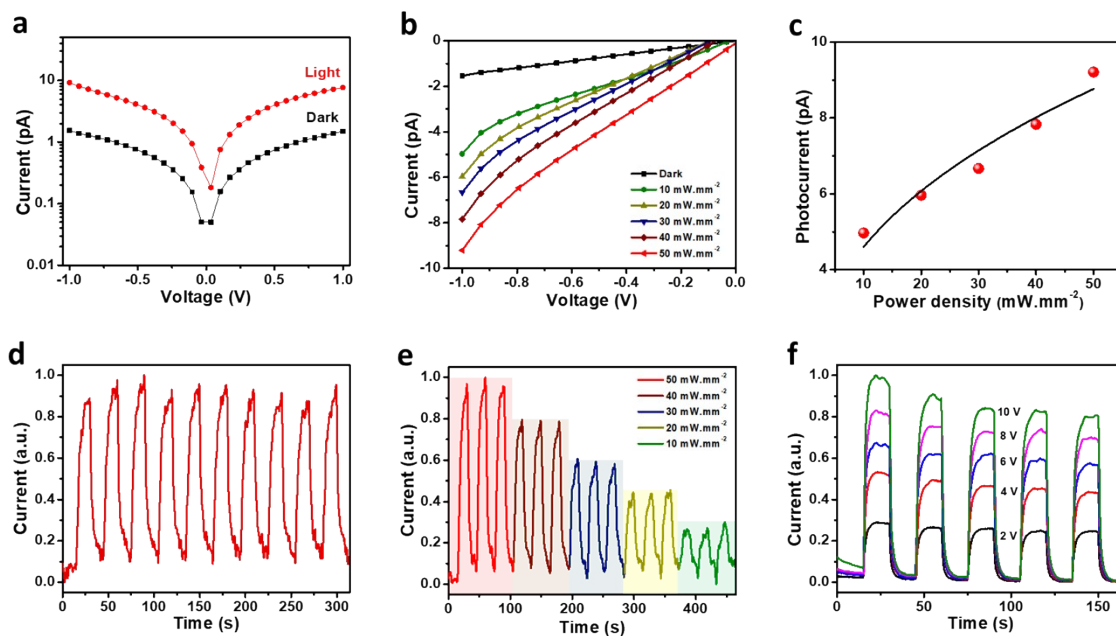

**Figure S11.** (a)  $I-V$  curves in dark and under light intensity of  $50 \text{ mW}\cdot\text{mm}^{-2}$  (808 nm). (b)  $I-V$  curves under varying light intensity ranging from  $10 \text{ mW}\cdot\text{mm}^{-2}$  to  $50 \text{ mW}\cdot\text{mm}^{-2}$ . (c) Plot of photocurrent variation with incident light intensity. Data points are fitted using the power law. (d) Time dependent photocurrent response under  $50 \text{ mW}\cdot\text{mm}^{-2}$  light intensity at 0 V bias (normalized plots). Current as a function of time ( $I-t$ ) curves at different (e) light irradiation intensities (0 V bias) (normalized plots) and (f) bias voltages ( $50 \text{ mW}\cdot\text{mm}^{-2}$ ) (normalized plots).

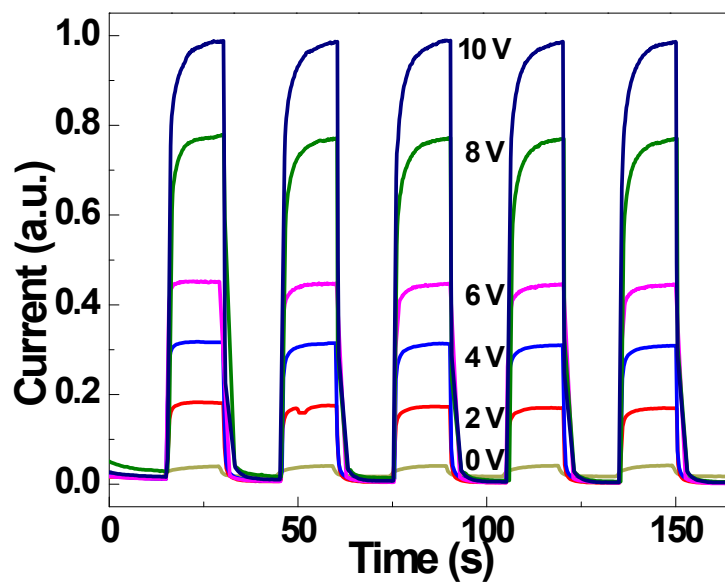

**Figure S12.** Current as a function of time ( $I$ - $t$ ) curves at different bias voltages (0 V to 10 V) (450 nm, 50 mW.mm<sup>-2</sup>). The data sets are normalized with respect to the values at 10 V.

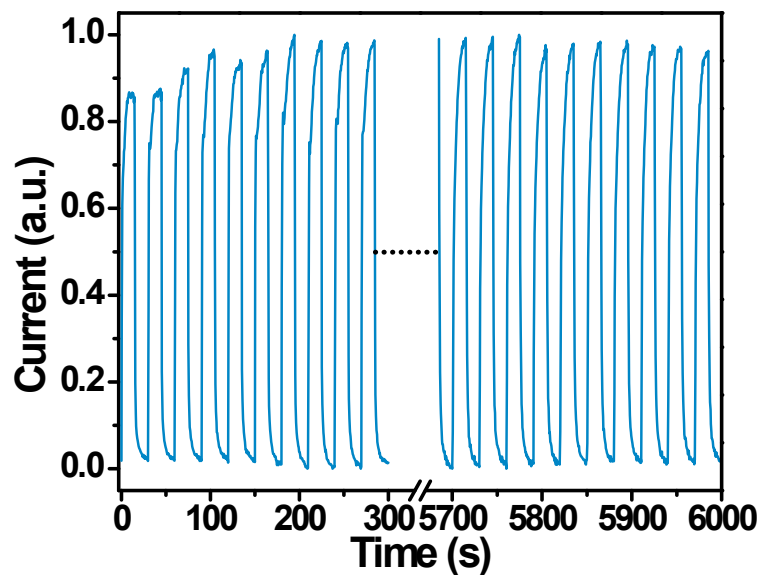

**Figure S13.** *I-t* plots of the crystal device for 200 continued cycles at 0 V bias under  $50 \text{ mW} \cdot \text{mm}^{-2}$  light intensity (450 nm), showing excellent cycling stability and reversibility.

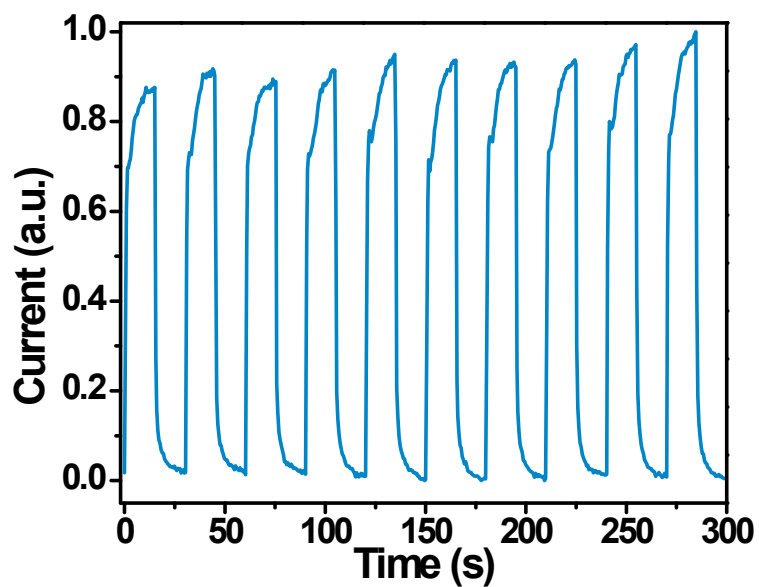

**Figure S14.** *I-t* plots of the crystal device at 0 V bias under  $50 \text{ mW}\cdot\text{mm}^{-2}$  light intensity (450 nm), after storage in open air for 3 months without encapsulation showing long-term environmental stability.



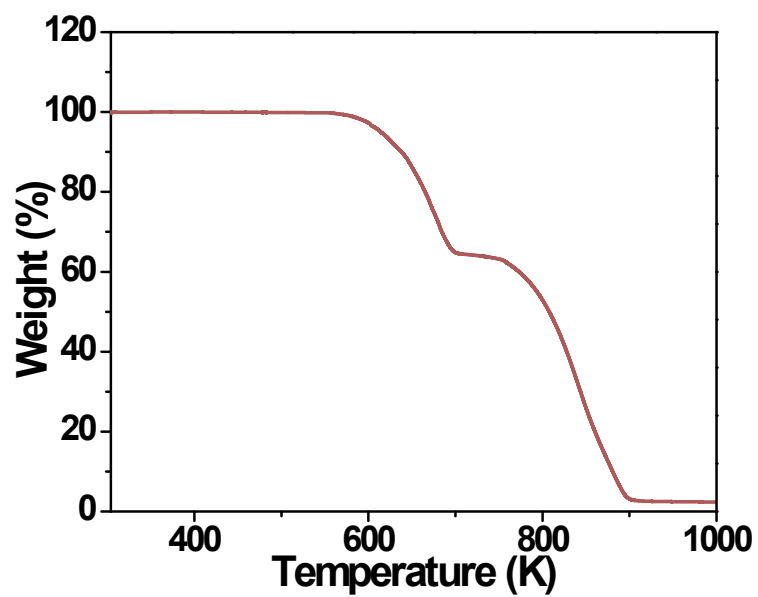

**Figure S15.** Thermogravimetric analysis (TGA) of (TMA)Cu<sub>2</sub>Br<sub>3</sub> depicting excellent thermal stability up to ~550 K.

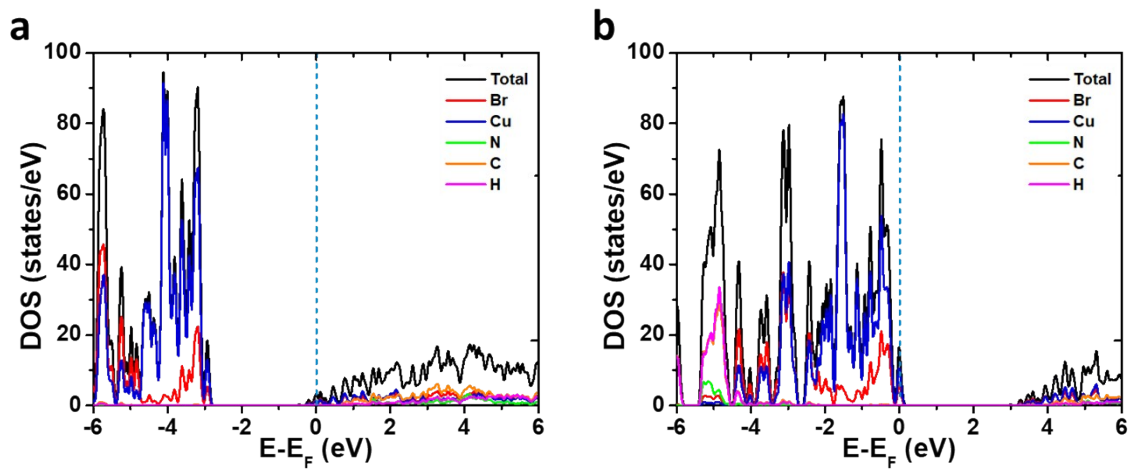

**Figure S16.** Atom projected density of state (DOS) plots along with the total density of state for (TMA) $\text{Cu}_2\text{Br}_3$  due to the (a) addition of an extra electron in the unit cell, and (b) removal of an electron (with a hole) in the unit cell.

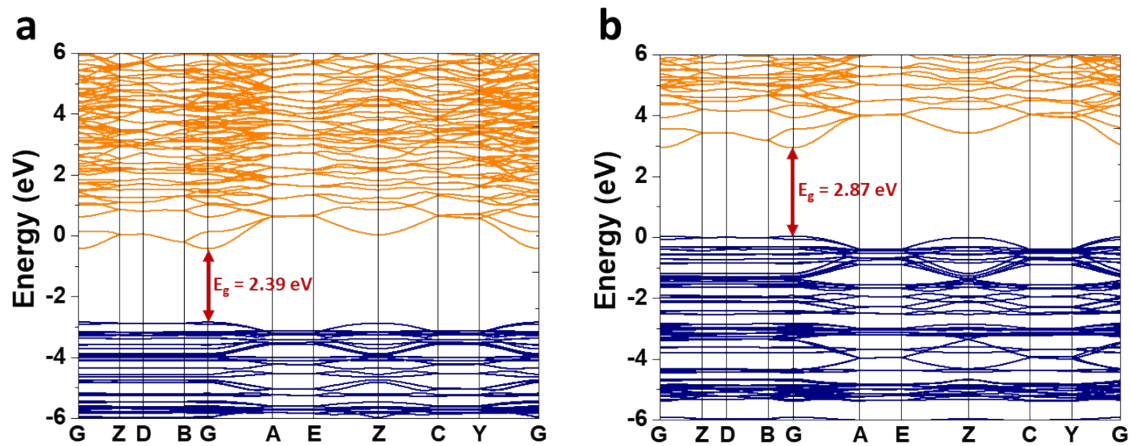

**Figure S17.** Electronic band structure of (TMA)Cu<sub>2</sub>Br<sub>3</sub> after the (a) addition of an extra electron in the unit cell, and (b) removal of an electron (with a hole) in the unit cell.

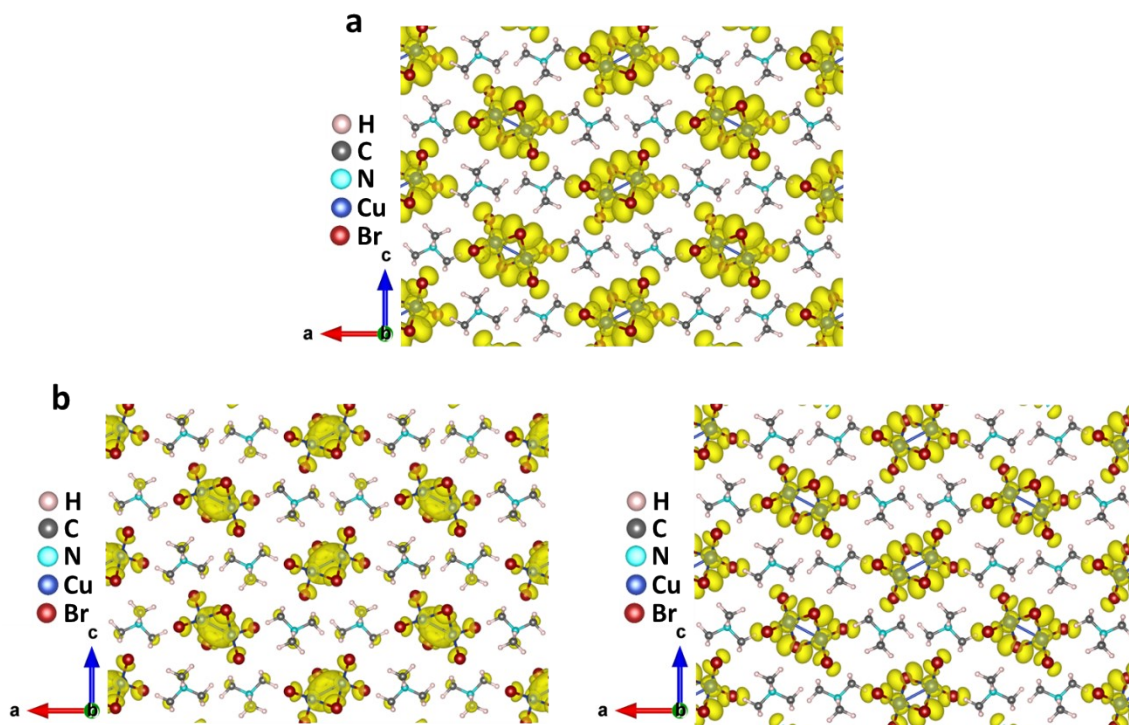

**Figure S18.**  $2 \times 2 \times 2$  unit cell of  $(\text{TMA})\text{Cu}_2\text{Br}_3$ : (a) Charge density plot indicating the distribution of electronic charge before photo excitation. (b) Charge density plot indicating the distribution of electronic charge at the CBM, upon addition of an extra electron in the unit cell. (Electron accumulation is represented by yellow isosurface) (left panel). (b) Charge density plot indicating the distribution of hole charge at the VBM, upon removal of an electron (with a hole) from the unit cell (right panel).

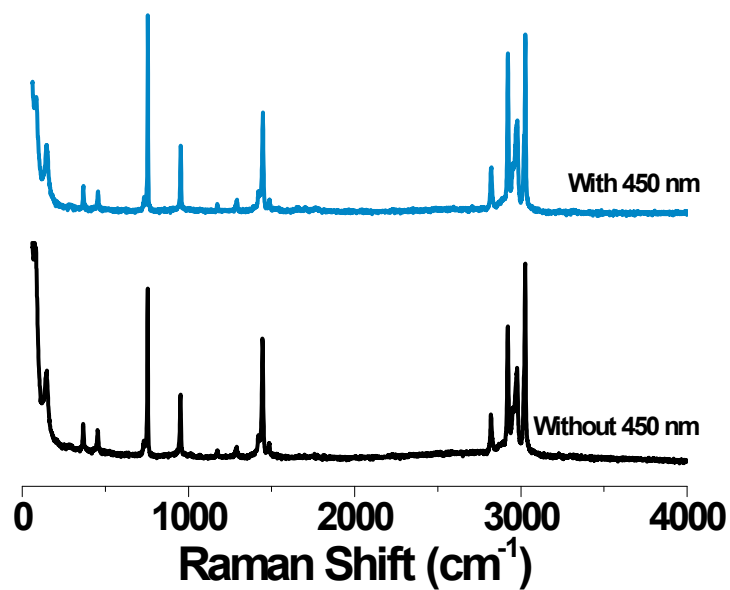

**Figure S19.** Comparison of full range experimental Raman spectral measurements ( $\lambda_{\text{exc}} = 632.8$  nm) carried out without and with additional 450 nm laser irradiation.

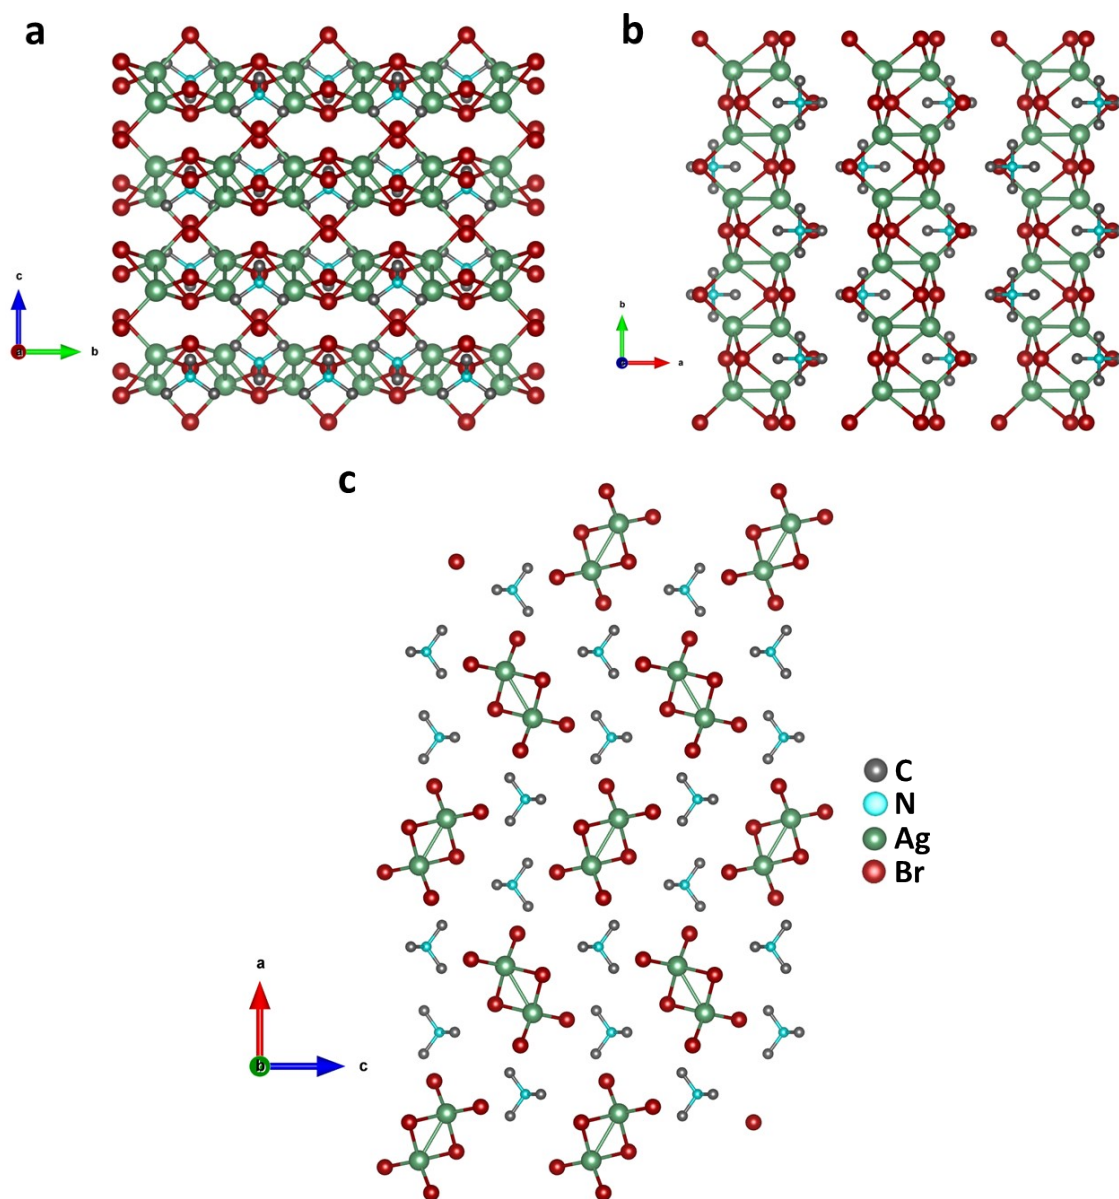

**Figure S20.** Crystal structure of  $(\text{TMA})\text{Ag}_2\text{Br}_3$  viewed along (a) a-axis, (b) c-axis, and (c) b-axis. H atoms are omitted for clarity. Each  $(\text{Ag}_2\text{Br}_3)_n^{n-}$  inorganic ladder is surrounded by six stacks of  $\text{TMA}^+$  cations.

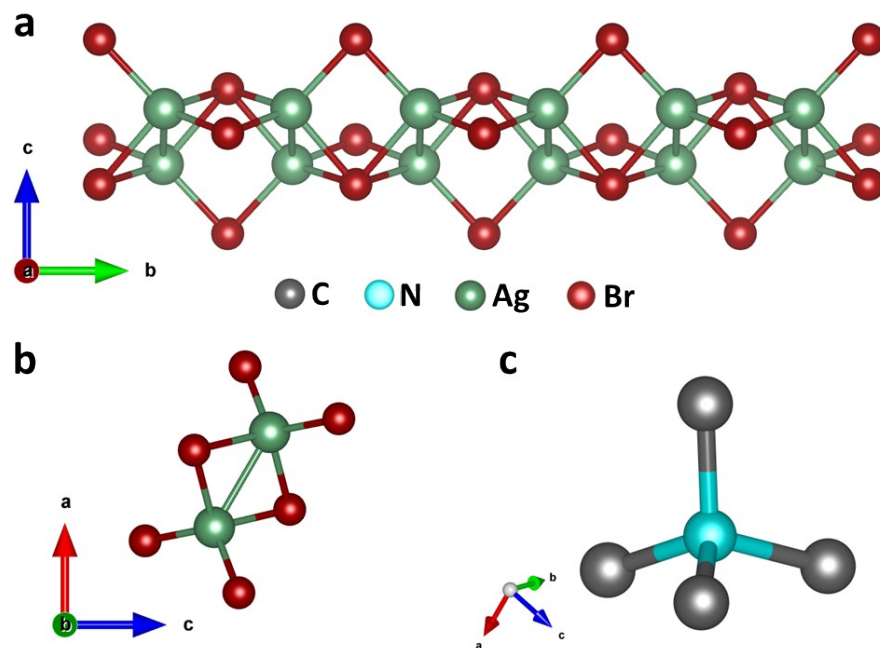

**Figure S21.** Polymeric chain of  $(Ag_2Br_3)_n^-$  anions viewed along (a) a-axis, (b) b-axis. (c) Zoomed-in view of tetramethylammonium (TMA) cation. Carbon, nitrogen, copper, and bromine atoms are represented by grey, cyan, green, and red coloured spheres.

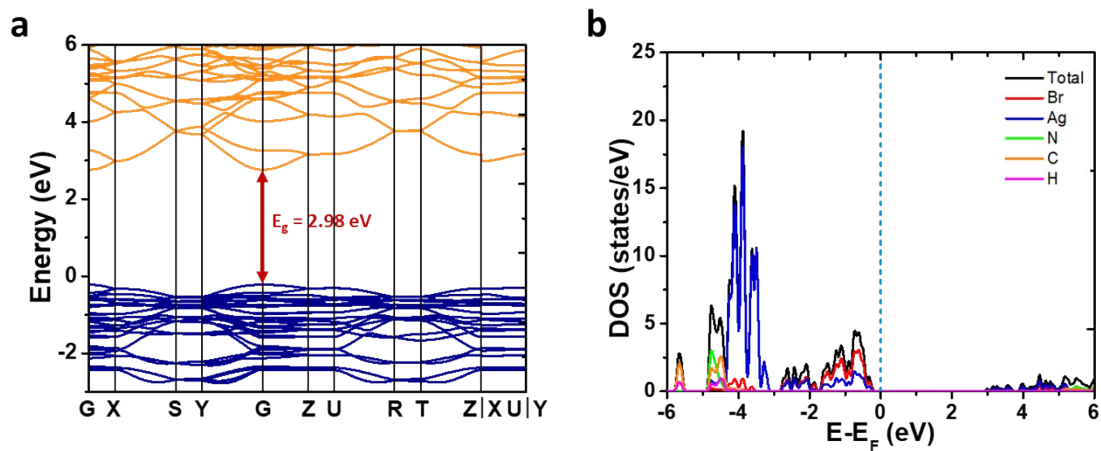

**Figure S22.** Electronic structure of  $(\text{TMA})\text{Ag}_2\text{Br}_3$ . (a) Electronic band structure calculated from DFT showing direct bandgap ( $E_g$ ) value of 2.98 eV at the Gamma (G) point. (b) Density of state (DOS) plots exhibiting the total as well as atomic contributions. Dotted vertical line represents the Fermi level ( $E_F$ ).



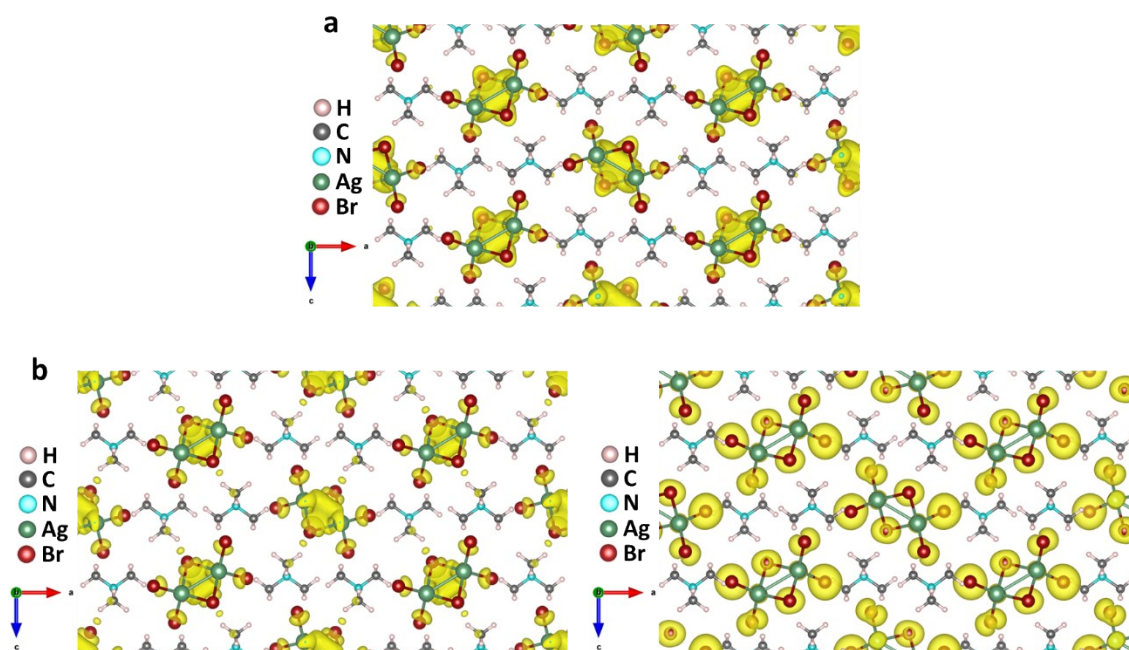

**Figure S23.** 2x2x2 unit cell of (TMA)Ag<sub>2</sub>Br<sub>3</sub>: (a) Charge density plot indicating the distribution of electronic charge before photo excitation. (b) Charge density plot indicating the distribution of electronic charge at the CBM, upon addition of an extra electron in the unit cell. (Electron accumulation is represented by yellow isosurface) (left panel). (b) Charge density plot indicating the distribution of hole charge at the VBM, upon removal of an electron (with a hole) from the unit cell (right panel).

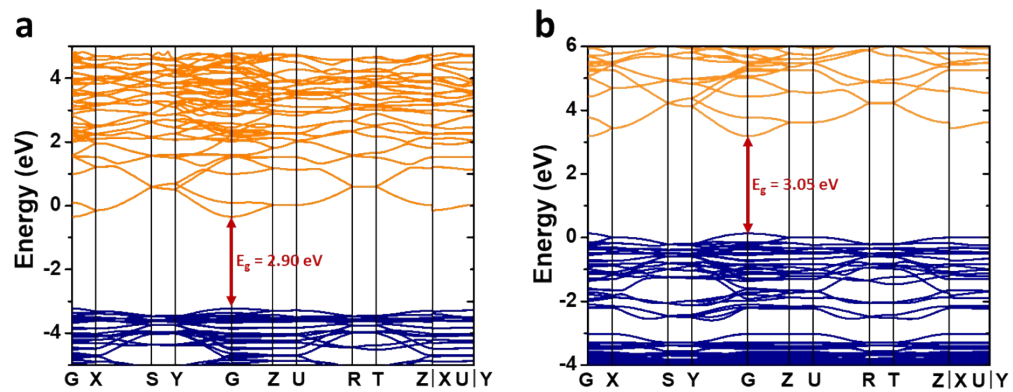

**Figure S24.** Electronic band structure of (TMA)Ag<sub>2</sub>Br<sub>3</sub> after the (a) addition of an extra electron in the unit cell, and (b) removal of an electron (with a hole) in the unit cell.

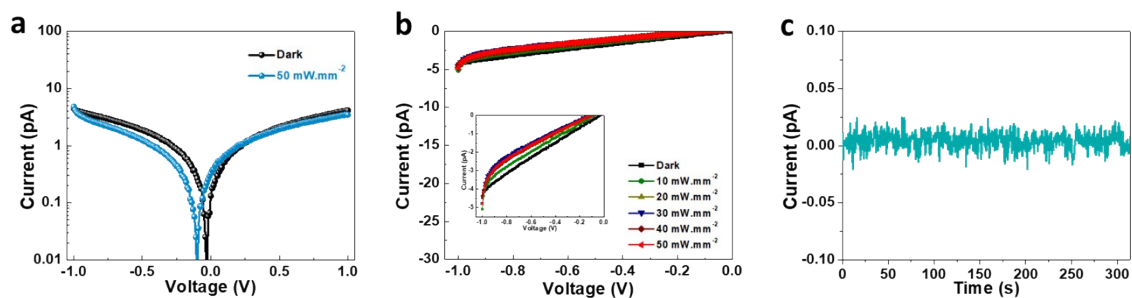

**Figure S25. Photo-responsivity on the (TMA)Ag<sub>2</sub>Br<sub>3</sub> system.** (a)  $I$ - $V$  curves in dark and under light intensity of 50 mW.mm<sup>-2</sup> (450 nm). (b)  $I$ - $V$  curves under varying light intensity ranging from 10 mW.mm<sup>-2</sup> to 50 mW.mm<sup>-2</sup> (inset: zoomed-in plots). (c) Time dependent photocurrent response under 50 mW.mm<sup>-2</sup> light intensity at 0 V bias.
